# Supplementary material
Source: MDPI journal article supplement (https://www.mdpi.com/2673-4834/3/4/66)
Supplement: s1 [file s1]

# Paleobiogeography of crown deer

## Roman Croitor

**Table S3.** Biostratigraphic and zoogeographic distribution of deer from the Late Miocene to the Late Pleitocene and their body mass diversity: data processing and visualisation (Python 3).

```
In [1]: import pandas as pd
import numpy as np
import seaborn as sns
import matplotlib.pyplot as plt
import warnings
warnings.simplefilter("ignore")
```

```
In [2]: deer_geo = pd.read_excel('deer distribution2.xlsx')
```

```
In [3]: deer_geo.head()
```

Out[3]:

|   | species                   | synonym                      | subfamily   | site              | zone<br>MN | period          | realm                 | source           | body<br>mass | source    |
|---|---------------------------|------------------------------|-------------|-------------------|------------|-----------------|-----------------------|------------------|--------------|-----------|
| 0 | gen. et sp.<br>indet. 1   | "Muntiacinae"                | Capreolinae | Creventille-<br>2 | MN11       | Late<br>Miocene | Western<br>Palearctic | Azanza<br>(2000) | 15.0         | tl<br>stu |
| 1 | Lucentia<br>iberica       | NaN                          | Capreolinae | Creventille-<br>2 | MN11       | Late<br>Miocene | Western<br>Palearctic | Azanza<br>(2000) | 27.5         | tl<br>stu |
| 2 | Lucentia<br>pierensis     | Eostyloceros<br>pierensis    | Capreolinae | Piera             | MN11       | Late<br>Miocene | Western<br>Palearctic | Azanza<br>(2000) | 53.0         | tl<br>stu |
| 3 | Turiacemas<br>concudensis | NaN                          | Capreolinae | Concud-3          | MN12       | Late<br>Miocene | Western<br>Palearctic | Azanza<br>(2000) | 47.0         | tl<br>stu |
| 4 | Procapreolus<br>sp. 1     | Pliocervus aff.<br>matheroni | Capreolinae | El Arquillo       | MN13       | Late<br>Miocene | Western<br>Palearctic | Azanza<br>(2000) | 35.0         | tl<br>stu |



```
In [4]: deer_geo['species'].nunique()
```

Out[4]: 204

**Comment:** the database includes 204 accepted deer species and cervid forms that likely are undescribed true species.

## Deer species of the subfamily Cervinae selected:

```
In [5]: cervinae = deer_geo.loc[deer_geo['subfamily'] == 'Cervinae']
```

```
In [6]: cervinae.head()
```

Out[6]:

|    | species                       | synonym               | subfamily | site                                     | zone<br>MN | period               | realm                 | source            | body<br>mass | sc |
|----|-------------------------------|-----------------------|-----------|------------------------------------------|------------|----------------------|-----------------------|-------------------|--------------|----|
| 23 | Eocervinus<br>ruscinensis     | Cervus<br>ruscinensis | Cervinae  | Mas<br>Belrich,<br>Vlleneuve-<br>La-Raho | MN14       | Early<br>Pliocene    | Western<br>Palearctic | Deperet<br>(1890) | 50.0         |    |
| 24 | Metacervocerus<br>pardinensis | Cervus<br>pardinensis | Cervinae  | Perrier-<br>Etouaires                    | MN16       | Late<br>Pliocene     | Western<br>Palearctic | Heintz<br>(1970)  | 85.0         |    |
| 25 | Praeclaphus<br>perrieri       | Cervus<br>perrieri    | Cervinae  | Perrier-<br>Etouaires                    | MN16       | Late<br>Pliocene     | Western<br>Palearctic | Heintz<br>(1970)  | 180.0        |    |
| 26 | Rucervus ardei                | Arvernoceros<br>ardei | Cervinae  | Perrier-<br>Etouaires                    | MN16       | Late<br>Pliocene     | Western<br>Palearctic | Heintz<br>(1970)  | 180.0        |    |
| 27 | Metacervocerus<br>rhenanus    | Cervus philisi        | Cervinae  | Seneze                                   | MN17       | Early<br>Pleistocene | Western<br>Palearctic | Heintz<br>(1970)  | 70.0         |    |

The records of Cervinae are grouped by species with a calculation of mean body size for species:

In [7]:

```
cervinae_group_species = cervinae.groupby('species').mean()
```

**Comment:** the calculation of predicted mean body size is needed since the predicted body masses of fossil species from different sub-epochs may be not the same according to the available craniodental variables.

The obtained result is a mean body mass for each Cervinae species in case if there are different body mass estimations in different sub-epochs:

In [8]:

```
cervinae_group_species.head()
```

Out[8]:

|                   | body mass  |
|-------------------|------------|
| species           |            |
| "Muntiacus" minor | 36.300000  |
| Axis axis         | 70.266667  |
| Axis fenqii       | 95.000000  |
| Axis flerovi      | 170.000000 |
| Axis javanicus    | 40.000000  |

The records of representatives of the subfamily Capreolinae selected:

In [9]:

```
capreolinae = deer_geo.loc[deer_geo['subfamily'] == 'Capreolinae']
```

## The records of Capreolinae grouped by species:

```
In [10]: capreolinae_group_species = capreolinae.groupby('species').mean()
```

## The obtained data plotted in order to visualize the species body mass distribution within the subfamilies Capreolinae and Cervinae:

```
In [11]: fig = plt.figure(figsize=(10, 5))

sns.kdeplot(x = "body mass", data = capreolinae_group_species, shade=True, clip = (5.0,
sns.kdeplot(x = "body mass", data = cervinae_group_species, shade=True, clip = (5.0, 80

plt.legend (labels = ["Capreolinae", "Cervinae"], fontsize=14)
plt.tick_params(axis='both', which='major', labelsize=12)

# plt.savefig("cervae_body_size_general.jpg", dpi = 600)
```

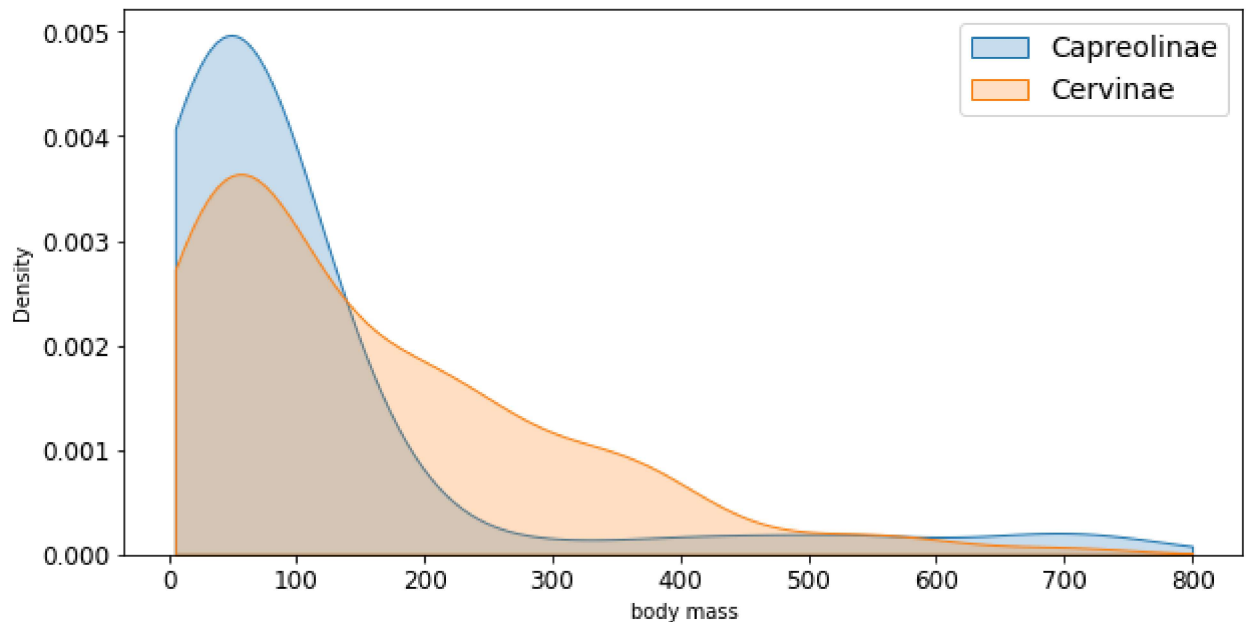

## The same data represented as a histogram (including the stem genus *Eostyloceros*):

```
In [12]: sns.histplot(data=deer_geo, x="body mass", hue="subfamily")
```

```
Out[12]: <AxesSubplot:xlabel='body mass', ylabel='Count'>
```

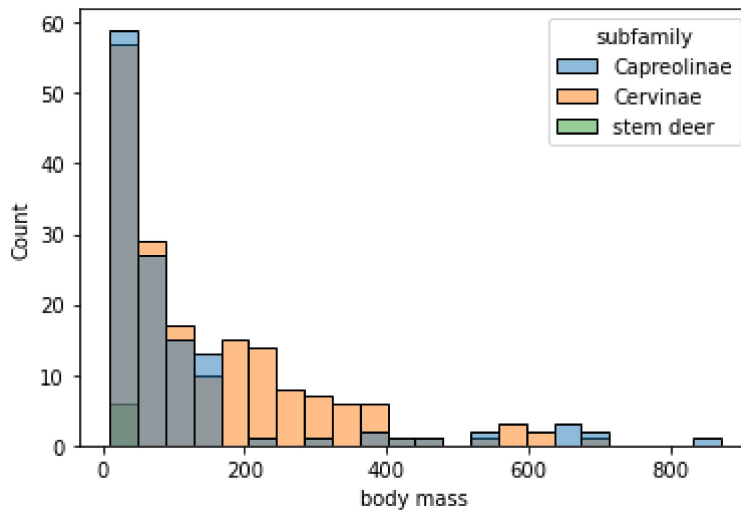

```
In [13]: sns.distplot(capreolinae_group_species['body mass'], bins=10, kde=True)
sns.distplot(cervinae_group_species['body mass'], bins=10, kde=True)

plt.legend (labels = ["Capreolinae", "Cervinae"], fontsize=14)
plt.tick_params(axis='both', which='major', labelsize=12)
```

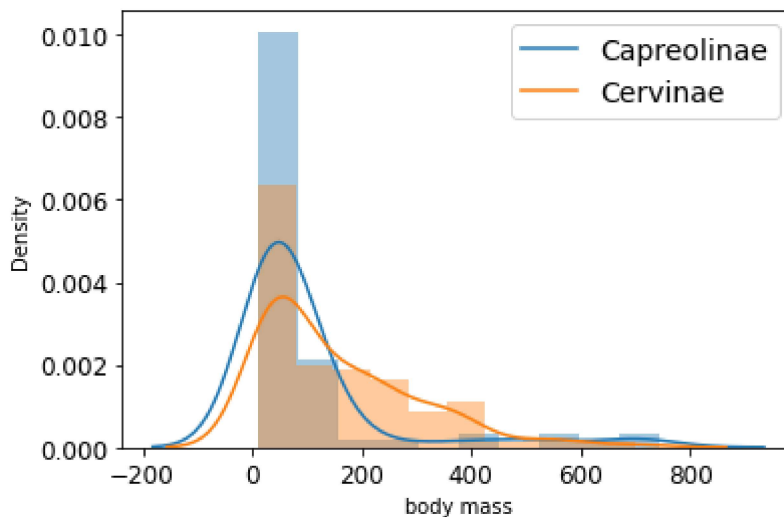

Data grouped by species, biogeographic region, and subfamily with calculation of mean species body mass:

```
In [14]: deer_geo_group = deer_geo.groupby(['species', 'realm', 'subfamily'], as_index = False)['
```

```
In [15]: deer_geo_group.head()
```

```
Out[15]:
```

|   | species              | realm              | subfamily   | body mass |
|---|----------------------|--------------------|-------------|-----------|
| 0 | Cervcerus huadeensis | Sino-Malayan       | Capreolinae | 125.0     |
| 1 | "Axis" flerowi       | Eastern Palearctic | Capreolinae | 40.0      |
| 2 | "Bretzia" sp.        | Sino-Malayan       | Capreolinae | 50.0      |
| 3 | "Cervavitus" flerowi | Sino-Malayan       | Capreolinae | 40.0      |

|   | species                | realm        | subfamily   | body mass |
|---|------------------------|--------------|-------------|-----------|
| 4 | "Eostyloceros" propria | Sino-Malayan | Capreolinae | 20.0      |

```
In [16]: df_cervinae = cervinae[cervinae.subfamily.isin(cervinae.subfamily.value_counts().head(5))
df_cervinae.head()
```

```
Out[16]:
```

|    | species                    | synonym            | subfamily | site                           | zone<br>MN | period            | realm              | source         | body<br>mass | sc |
|----|----------------------------|--------------------|-----------|--------------------------------|------------|-------------------|--------------------|----------------|--------------|----|
| 23 | Eocervinus ruscinensis     | Cervus ruscinensis | Cervinae  | Mas Belrich, Vlleneuve-La-Raho | MN14       | Early Pliocene    | Western Palearctic | Deperet (1890) | 50.0         |    |
| 24 | Metacervocerus pardinensis | Cervus pardinensis | Cervinae  | Perrier-Etouaires              | MN16       | Late Pliocene     | Western Palearctic | Heintz (1970)  | 85.0         |    |
| 25 | Praeelaphus perrieri       | Cervus perrieri    | Cervinae  | Perrier-Etouaires              | MN16       | Late Pliocene     | Western Palearctic | Heintz (1970)  | 180.0        |    |
| 26 | Rucervus ardei             | Arvernoceros ardei | Cervinae  | Perrier-Etouaires              | MN16       | Late Pliocene     | Western Palearctic | Heintz (1970)  | 180.0        |    |
| 27 | Metacervocerus rhenanus    | Cervus philisi     | Cervinae  | Seneze                         | MN17       | Early Pleistocene | Western Palearctic | Heintz (1970)  | 70.0         |    |

```
In [17]: df_capreolinae = capreolinae[capreolinae.subfamily.isin(capreolinae.subfamily.value_cou
df_capreolinae.head()
```

```
Out[17]:
```

|   | species                | synonym                   | subfamily   | site          | zone<br>MN | period       | realm              | source        | body<br>mass | source |
|---|------------------------|---------------------------|-------------|---------------|------------|--------------|--------------------|---------------|--------------|--------|
| 0 | gen. et sp. indet. 1   | "Muntiacinae"             | Capreolinae | Creventille-2 | MN11       | Late Miocene | Western Palearctic | Azanza (2000) | 15.0         | tl stu |
| 1 | Lucentia iberica       | NaN                       | Capreolinae | Creventille-2 | MN11       | Late Miocene | Western Palearctic | Azanza (2000) | 27.5         | tl stu |
| 2 | Lucentia pierensis     | Eostyloceros pierensis    | Capreolinae | Piera         | MN11       | Late Miocene | Western Palearctic | Azanza (2000) | 53.0         | tl stu |
| 3 | Turiacemas concudensis | NaN                       | Capreolinae | Concud-3      | MN12       | Late Miocene | Western Palearctic | Azanza (2000) | 47.0         | tl stu |
| 4 | Procapreolus sp. 1     | Pliocervus aff. matheroni | Capreolinae | El Arquillo   | MN13       | Late Miocene | Western Palearctic | Azanza (2000) | 35.0         | tl stu |

The diagram showing the diversity of species of the subfamily Cervinae according to biogeographic area and sub-epochs (dark areas represent higher species diversity):

```
In [18]: fig = plt.figure(figsize=(10, 5))
```

```
sns.histplot(cervinae, x="period", y = 'realm', color='orange')
```

```
# plt.xlabel(fontsize=14)
```

```
# plt.ylabel(fontsize=14)
```

Out[18]: <AxesSubplot:xlabel='period', ylabel='realm'>

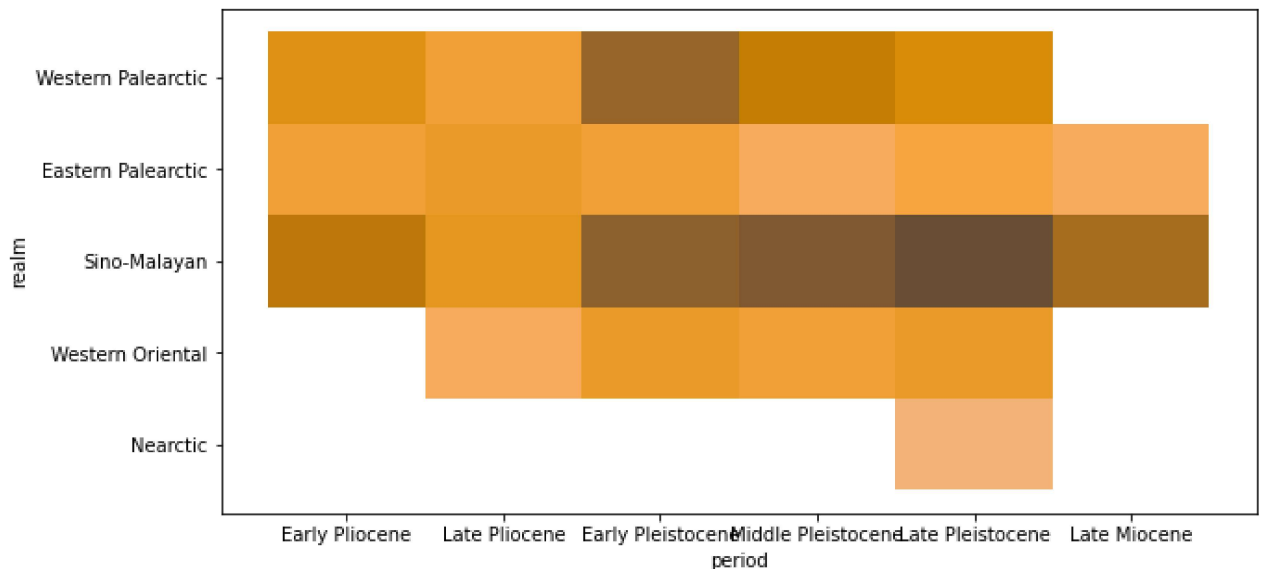

**Comment:** dark rectangles show the highest diversity of Cervinae

**The diagram showing the diversity of species of the subfamily Capreolinae according to biogeographic area and sub-epochs:**

```
In [19]: fig = plt.figure(figsize=(10, 5))
sns.histplot(capreolinae, x="period", y = 'realm')
```

Out[19]: <AxesSubplot:xlabel='period', ylabel='realm'>

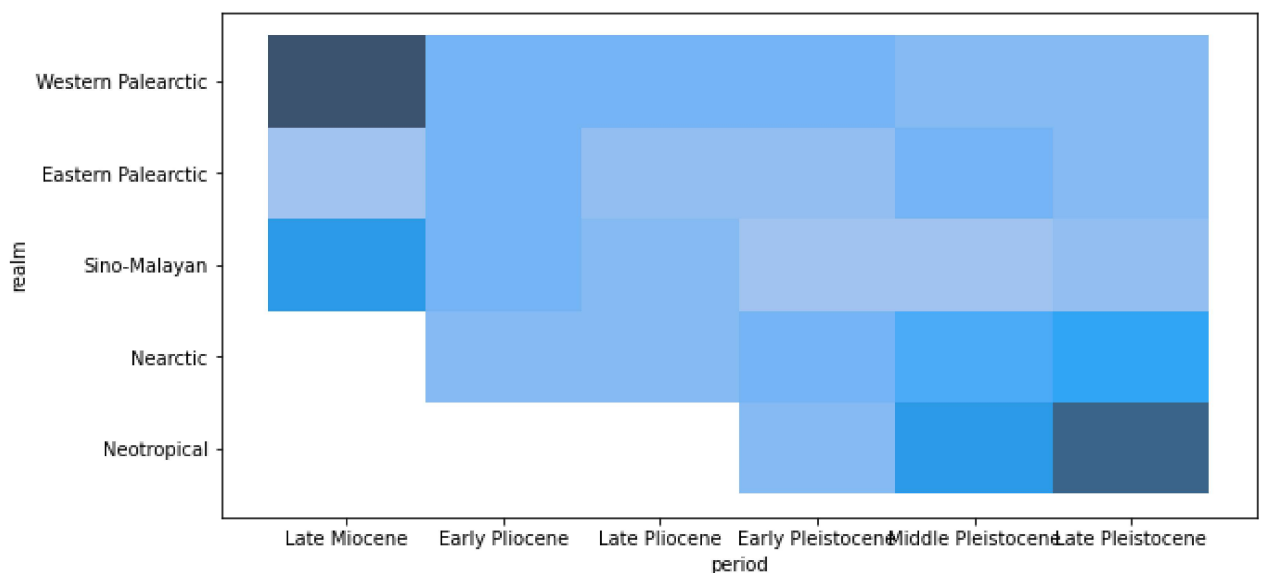

**Comment:** the diagram shows two biogeographic areas with highest diversity that correspond to two important evolutionary radiations of Capreolinae in the Late Miocene of Western Palearctic and the Late Pleistocene of Neotropic realm.

```
In [20]: capreolinae_radiation = capreolinae.loc[deer_geo['period'] == 'Late Miocene']
```

**The species body mass distribution within the Late Miocene evolutionary radiation of the subfamily Capreolinae in western Palearctic:**

```
In [21]: sns.histplot(data=capreolinae_radiation, x="body mass", bins = 10)
```

```
Out[21]: <AxesSubplot:xlabel='body mass', ylabel='Count'>
```

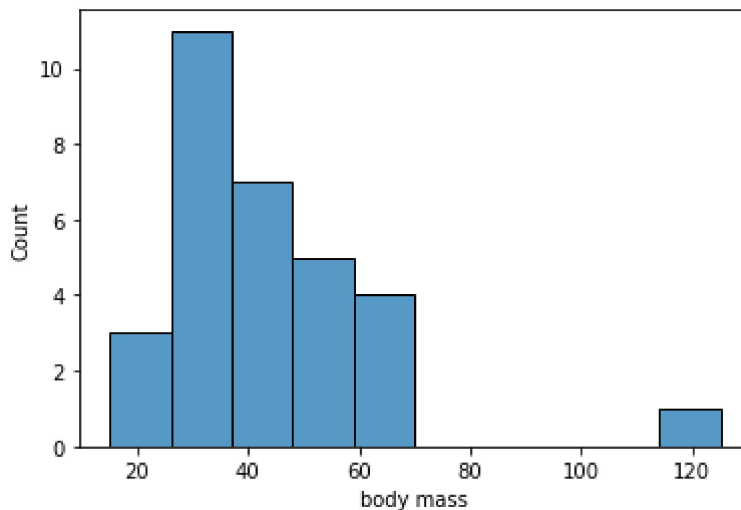

```
In [22]: cervinae_radiation = cervinae.loc[cervinae['period'] == 'Late Miocene']
```

**The species body mass distribution within the Late Miocene evolutionary radiation of the subfamily Cervinae in Sino-Malayan area:**

```
In [23]: sns.histplot(data=cervinae_radiation, x="body mass", bins = 10)
```

```
Out[23]: <AxesSubplot:xlabel='body mass', ylabel='Count'>
```

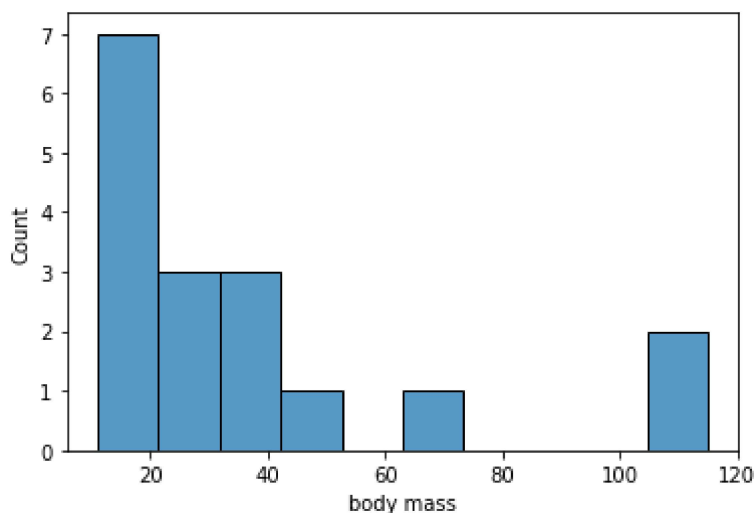

```
In [24]: capreolinae_radiation2 = capreolinae.loc[deer_geo['realm'] == 'Neotropical']
```

## The species body mass distribution within the Pleistocene evolutionary radiation of the subfamily Capreolinae in South America:

```
In [25]: sns.histplot(data=capreolinae_radiation2, x="body mass", bins = 15)  
# plt.savefig("cerv_second_rad_capreolinae.jpg")
```

```
Out[25]: <AxesSubplot:xlabel='body mass', ylabel='Count'>
```

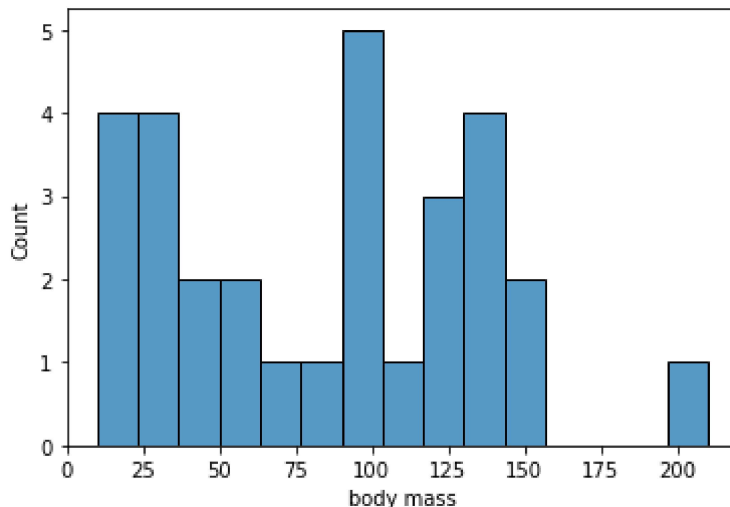

## Combined diagrams of body mass diversity within evolutionary radiations of crown deer:

```
In [30]: fig, axes = plt.subplots(3, 1, figsize=(10,12))  
plt.suptitle('Body size distribution of evolutionary radiations of Cervidae', fontsize=  
sns.histplot(data=cervinae_radiation, x="body mass", bins = 10, ax=axes[0]).set(title='  
sns.histplot(data=capreolinae_radiation, x="body mass", bins = 10, ax=axes[1]).set(titl  
sns.histplot(data=capreolinae_radiation2, x="body mass", bins = 15, ax=axes[2]).set(tit  
  
fig.tight_layout()  
plt.savefig("cervae_radiations.jpg", dpi = 600)
```



## Body size distribution of evolutionary radiations of Cervidae

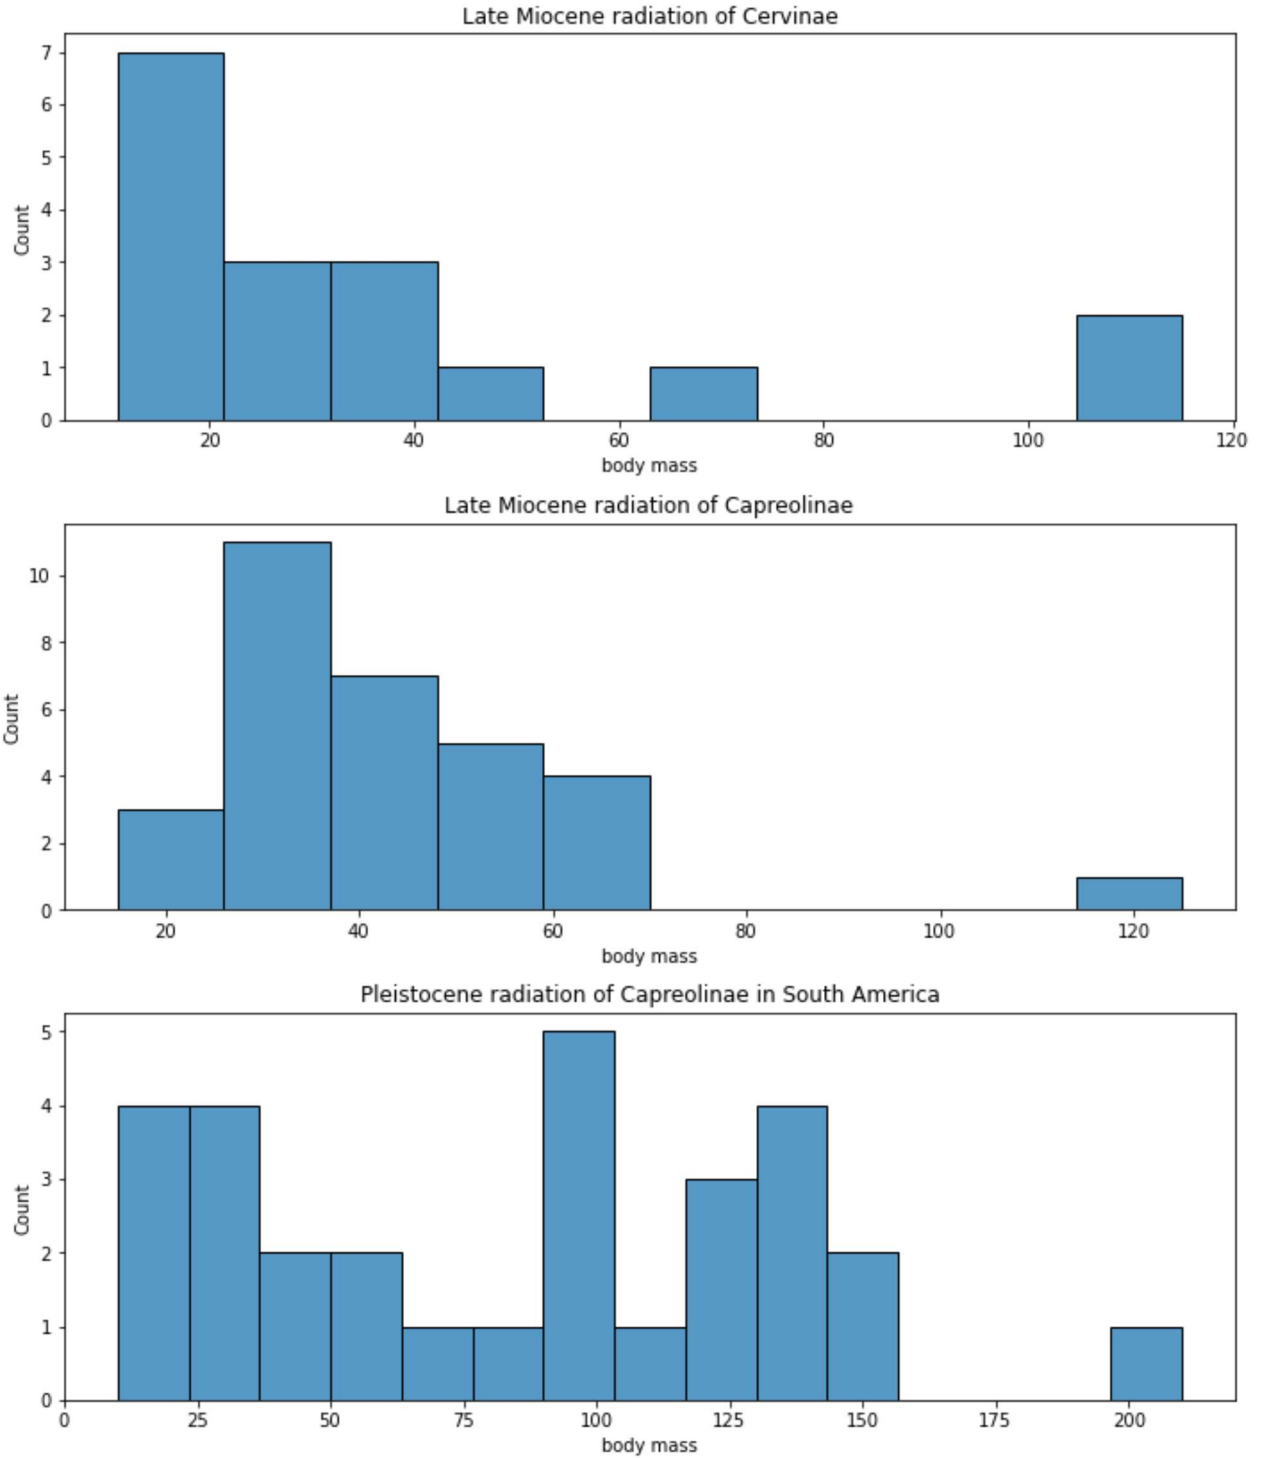

```
In [27]: deer_geo_drop = deer_geo.drop(deer_geo[deer_geo.subfamily == "stem deer"].index)
```

Species body mass range of crown deer in sub-epochs (with outliers, i.e. extremely large-sized species):

```
In [31]: fig = plt.figure(figsize=(12, 8))
sns.boxplot(y='body mass', x='period', data=deer_geo_drop, hue='subfamily')
fig.tight_layout()
plt.savefig("cervae_body_size_boxplot_outliers.jpg", dpi = 600)
```

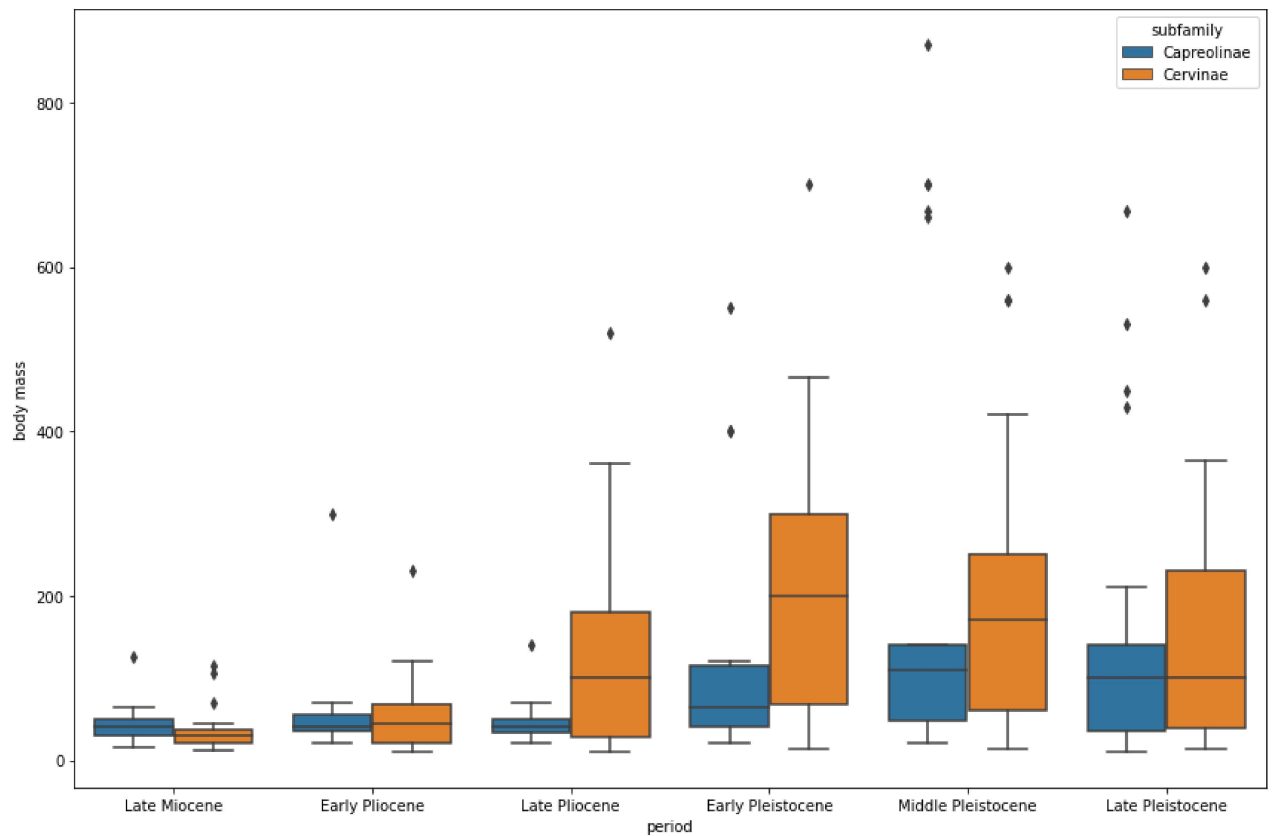

Species body mass range of crown deer in sub-epochs (outliers excluded):

```
In [29]: fig = plt.figure(figsize=(12, 8))
sns.boxplot(y='body mass', x='period', data=deer_geo_drop, hue='subfamily', showfliers=

plt.legend (fontsize=14)
plt.tick_params(axis='both', which='major', labelsz=12.5)

# plt.savefig("cervidae_body_size_boxplot.jpg", dpi = 600)
```

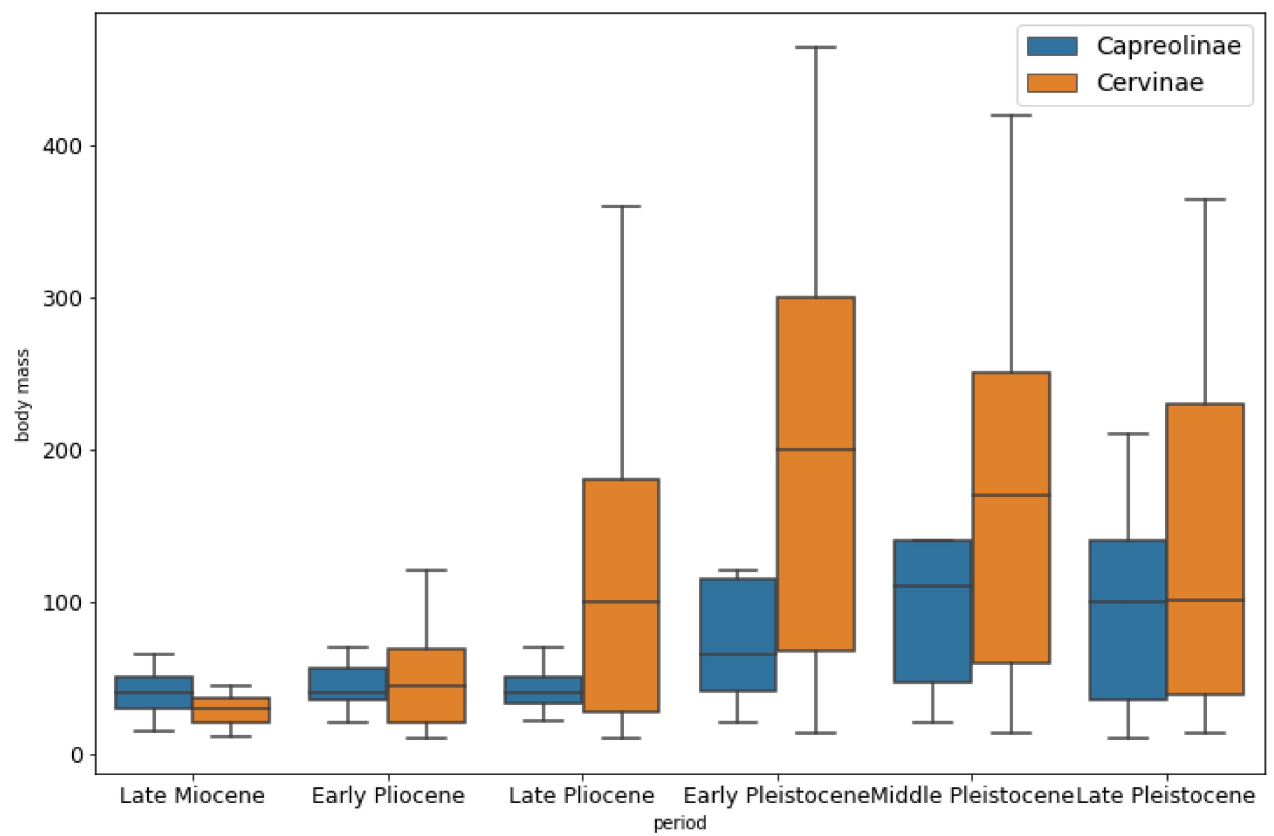

In [ ]:
